# Supplementary material for: Medication Prescribing Quality in Australian Primary Care Patients with Chronic Kidney Disease
Source: MDPI journal article supplement (doi:10.3390/jcm9030783), 2020-03-13
Supplement: s1 [file s1]

## Supplementary Figure 1 and Figure 2.

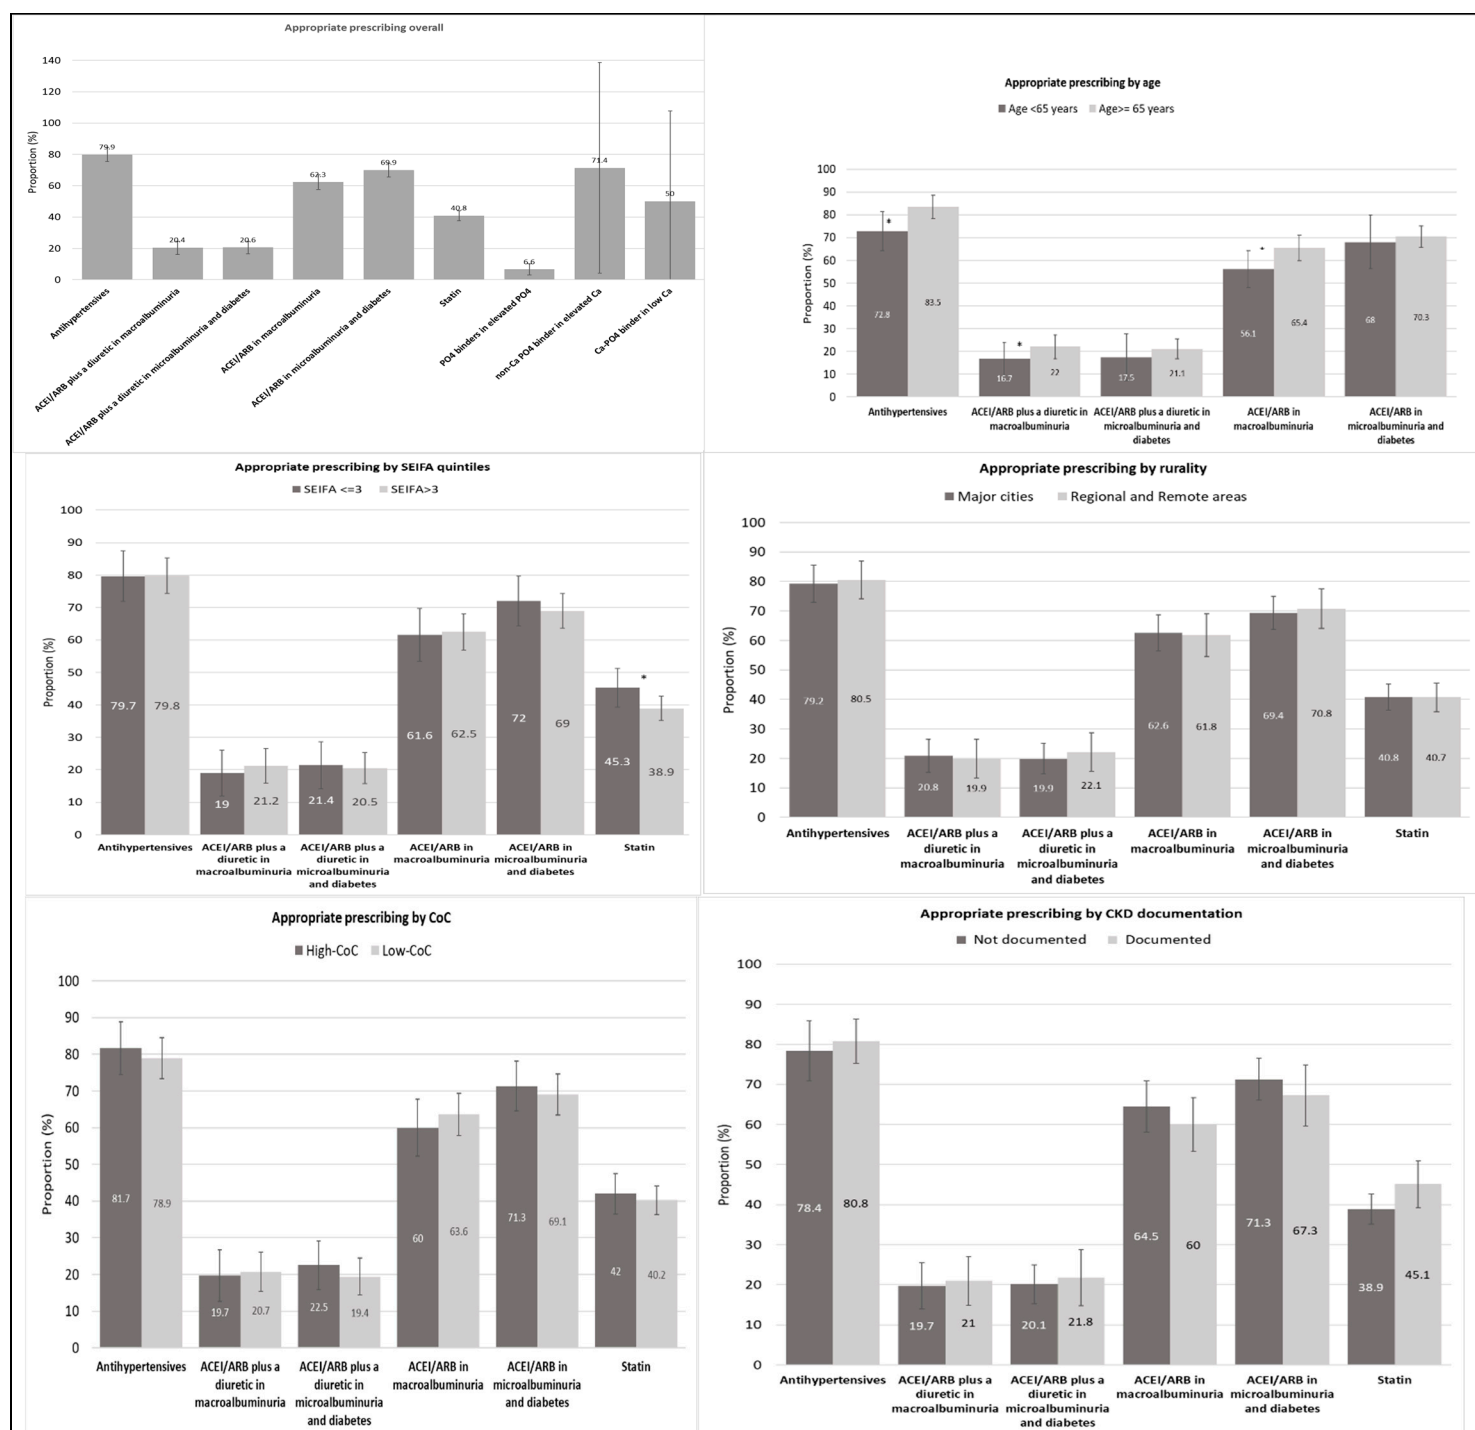

**Figure 1.** Appropriate prescribing in patients with chronic kidney disease (CKD) stages 3-5 assessed with prescribing quality indicators (PQIs). Appropriate phosphate ( $\text{PO}_4^{2-}$ ) binder prescribing (not operational and no further sub-analyses). Detail definitions of PQIs are presented in Table 4. ACEI, Angiotensin-converting enzyme inhibitor; ARB, angiotensin receptor blocker; CoC, continuity of care; SEIFA, socio-economic Indexes for areas.

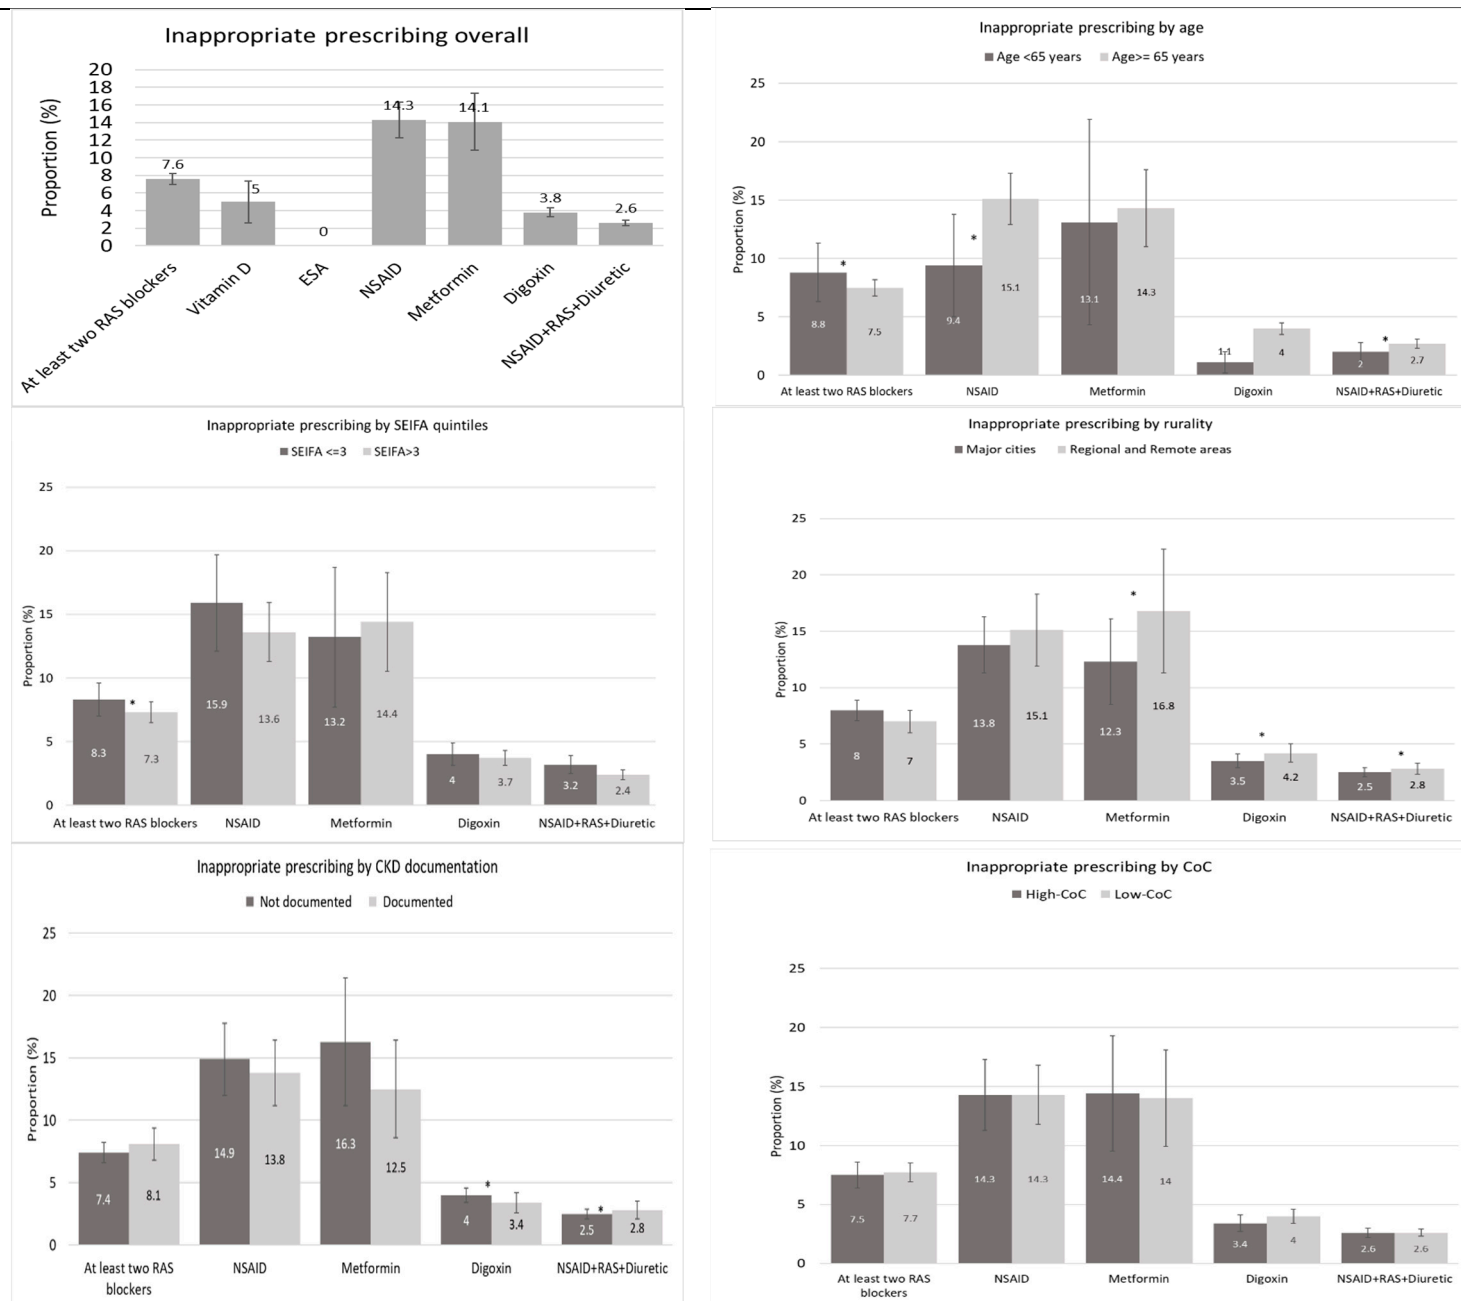

**Figure 2.** Potential inappropriate prescribing assessed with five prescribing quality indicators (PQIs). Detail definitions of PQIs are presented in Table 4. CoC, continuity of care; ESA, erythropoiesis-stimulating agent; eGFR, estimated glomerular filtration rate; NSAID, non-steroidal inflammatory drug; RAS, two renin-angiotensin system; and SEIFA, socio-economic Indexes for areas.
